# Supplementary material for: Unexpected genomic features in widespread intracellular bacteria: evidence for motility of marine chlamydiae
Source: PubMed Central journal article supplement — ISME J. 2017 Jun 23;11(10):2334–44. doi: 10.1038/ismej.2017.95 (PMC5604735; doi:10.1038/ismej.2017.95), 2017-06-23
Supplement: NIHMS72802-supplement-Supplementary_Information.pdf [file NIHMS72802-supplement-Supplementary_Information.pdf]

**Unexpected genomic features in widespread intracellular  
bacteria: evidence for motility of marine chlamydiae**

Astrid Collingro, Stephan Köstlbacher, Marc Mussmann,  
Ramunas Stepanauskas, Steven J. Hallam, Matthias Horn

**Supplementary Information**

## **Contents**

### **Phylogeny of marine SAGs**

Supplementary Text 1

Supplementary Figure 1

### **Supplementary Figure 2**

### **Presence of chlamydial hallmark genes and new protein families in the marine SAGs**

Supplementary Text 2

Supplementary Table 1

### **Metabolic features of SAGs absent in other chlamydiae**

Supplementary Text 3

Supplementary Text 4

Supplementary Figure 4

### **Flagellar genes in chlamydiae**

Supplementary Text 5

### **Flagellar genes in marine SAGs**

Supplementary Text 6

### **Phylogeny of flagellar proteins encoded in the SAGs**

Supplementary Text 7

Supplementary Table 2

Supplementary Figure 5

Supplementary Table 3

Supplementary Table 4

### **Supplementary References**

## Phylogeny of marine SAGs

### Supplementary Text 1

Phylogenetic analysis using publically available near-full length 16S rRNA sequences of chlamydiae demonstrated the affiliation of one SAG (AB-751-O23) with a lineage of deeply branching and yet uncultivated chlamydiae of marine origin represented so far only by a single clone sequence detected in the marine coastal lake Lago di Paola, Italy (FR714417, Pizzetti *et al.*, 2012, 90.44% similarity to AB-751-O23) ([Figure 1](#), [Supplementary Figure 1](#)). The partial 16S rRNA sequence of SAG AG-110-M15 was added to the full-length gene tree and formed a divergent potential sister lineage to SAG AB-751-O23 (81% identity over 480 nucleotides). The sequence closest related to the SAG AG-110-M15 sequence is again of marine origin and belongs to a clone detected in a sample from seafloor lavas in Hawaii, USA (EU491150, Santelli *et al.*, 2008, 88% similarity to AG-110-M15). The 16S rRNA of SAG AG-110-P3 clusters with members of the deeply branching family PCF5 identified earlier (Lagkouvardos *et al.*, 2014) and is most similar (90.37%) to a sequence derived from a lucinid bivalve collection site at Dog Island Florida, USA (EU488135).

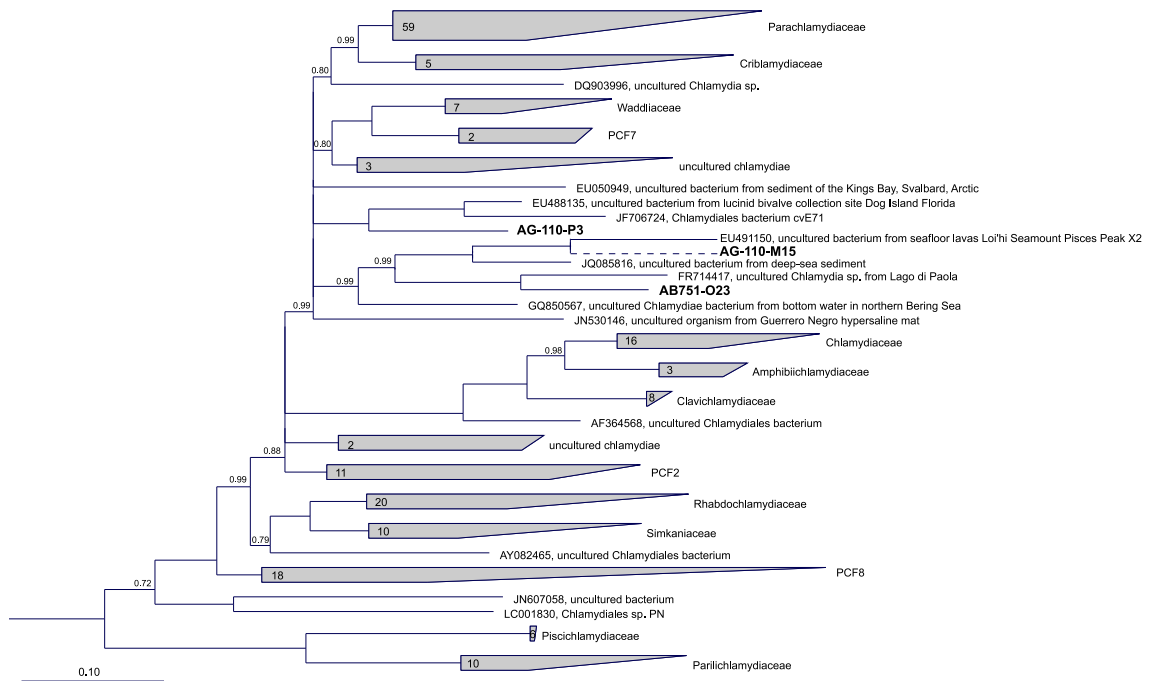

**Supplementary Figure 1. 16S rRNA-based phylogeny of SAGs indicating their affiliation to deeply branching chlamydial lineages.**

Bayesian inference of near full-length 16S rRNA sequences. Posterior probabilities are indicated only if <1. The partial 16S rRNA sequence of AG-110-M15 was added to the tree using the Quick-Add Parsimony option in ARB.

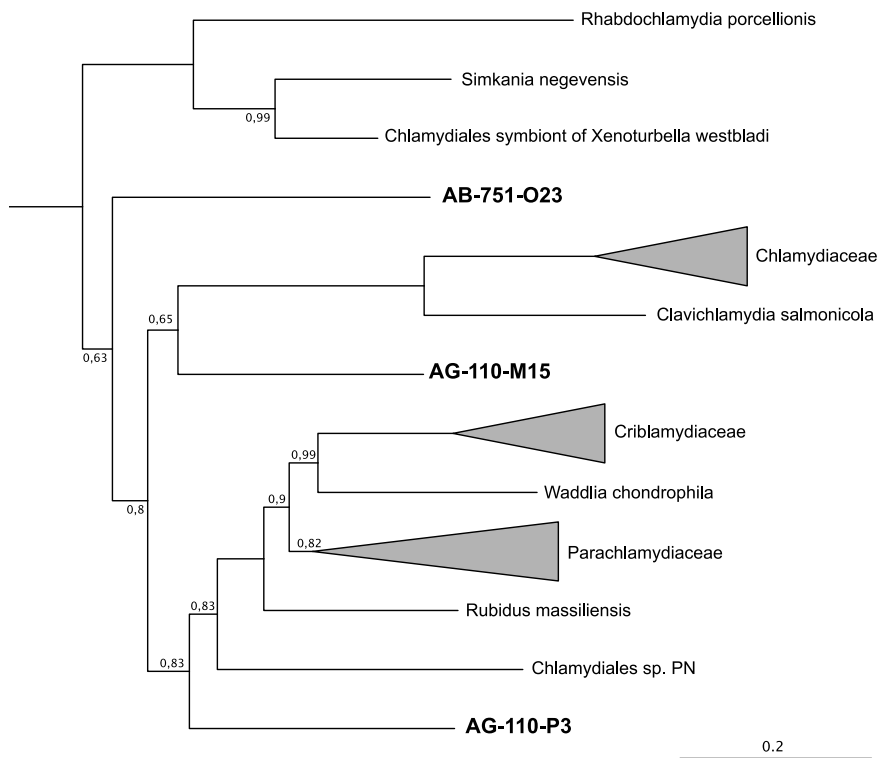

**Supplementary Figure 2. Phylogeny of marker genes present in all three SAGs confirms their affiliation to the chlamydiae.**

Bayesian inference of seven concatenated single copy marker genes including the ribosomal proteins rs7, rs12, r16, r18, rs5, r15, rs10, and rs8. Posterior probabilities are indicated only if <1.

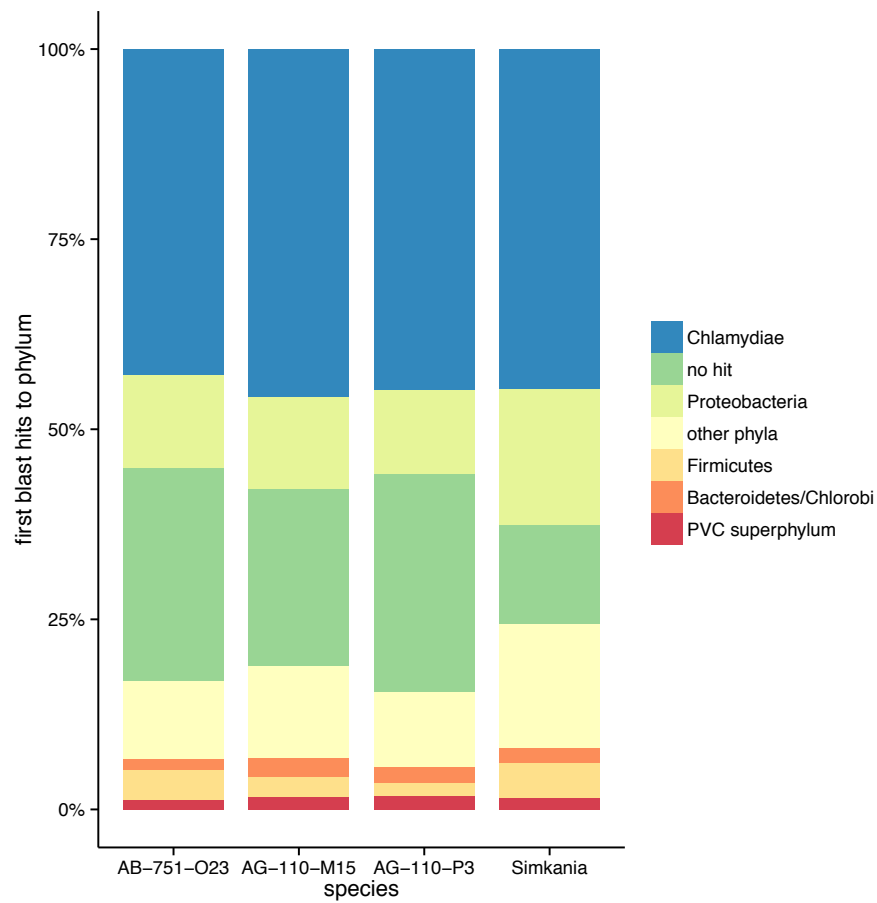

**Supplementary Figure 3. The SAGs have a similar taxonomic distribution of first blast hits as other chlamydial genomes.**

The relative taxonomic distribution on phylum level of the first blast hit of all proteins encoded in the SAGs and for comparison in a complete chlamydial genome (*Simkania negevensis*) is shown.

## Presence of chlamydial hallmark genes and new protein families in the marine SAGs

### Supplementary Text 2

Due to their obligate intracellular lifestyle chlamydiae encode many genes for interference with and exploitation of their eukaryotic host cells (Elwell *et al.*, 2016). Some of them, including chlamydia-specific genes, could also be detected in at least one of the SAGs ([Supplementary Table 1](#)). Among those are genes encoding proteins involved in host cell manipulation such as the tail-specific protease Tsp and HtrA, a protease important in the replicative stage of the developmental cycle (Gloeckl *et al.*, 2013; Patel *et al.*, 2014). Structural components of the NF-T3S apparatus are encoded in the SAGs together with a large number of predicted effector proteins containing eukaryotic-domains and potentially involved in protein-protein interactions (like ankyrin repeats, TPR repeats, and F-box proteins), carbohydrate-binding (cadherin-like domains and RHS repeats) or the interference with the host ubiquitination pathway (ubiquitin carboxyl-terminal hydrolase and RING-finger domains)(Domman *et al.*, 2014).

In addition, a number of very large proteins potentially involved in host interaction are encoded in the SAGs. SAG AB-751-O23 for example hosts two protein families with three and four members, respectively. Proteins within the first family (BQ\_00010, CA\_00010, CT\_00010) show weak homology to the ice-nucleation protein of *Caulobacter crescentus* or other alphaproteobacterial large exoproteins that are potentially involved in adhesion. Members of the second protein family (AI\_00010, AV\_00060, AZ\_00040, BM\_00010) show homology to self-associating autotransporters (SAATs)(Klemm *et al.*, 2006). Such SAATs have been described in a number of bacterial pathogens, in which they function in adhesion and invasion but also in auto-aggregation and even biofilm formation (Charbonneau *et al.*, 2006; Klemm *et al.*, 2006).

**Supplementary Table 1. Presence of chlamydial virulence associated genes in the SAGs.**

|                                                                   | <b>AB-751-O23</b>                                                                                                                       | <b>AG-110-M15</b>                  | <b>AG-110-P3</b>                                                                                                    |
|-------------------------------------------------------------------|-----------------------------------------------------------------------------------------------------------------------------------------|------------------------------------|---------------------------------------------------------------------------------------------------------------------|
| Structural components of the NF-T3S apparatus                     | sctL (BV_00010),<br>sctR (BV_00020),<br>sctS (BV_00030),<br>sctT (BV_00040),<br>sctW (AF_00160),<br>sctV (AF_00170),<br>sctU (AF_00180) | sctV(AG_00110),<br>sctU (AG_00120) | sctQ (AN_00020),<br>sctN (AN_00100),<br>sctG (AN_00120),<br>sctF (AN_00130),<br>sctE (AN_00140),<br>sctD (AN_00150) |
| Nucleotide transporter                                            | AF_00140,<br>AG_00130                                                                                                                   | AA_00360,<br>AD_00330,<br>BA_00030 | AJ_00150,<br>AU_00190,<br>AU_00200                                                                                  |
| Ser/Thr-proteases                                                 | pknD (AB_00310),<br>tsp (AB_00220),<br>Do-like (AA_00440)                                                                               |                                    | pkn5 (AN_00010),<br>tsp (AU_00070),<br>htrA (AY_00070)                                                              |
| Transcriptional regulator early upstream open reading frame (euo) | euo (AE_00020)                                                                                                                          |                                    |                                                                                                                     |
| Chlamydia protease-like activity factor (CPAF)                    |                                                                                                                                         | AM_00080                           | AQ_00070                                                                                                            |
| Macrophage infectivity potentiator (mip)                          |                                                                                                                                         | AW_00050                           |                                                                                                                     |
| Chlamydia virulence plasmid homologs                              |                                                                                                                                         | pGP6-D (AE_00420)                  | pGP8-D (AR_00180)                                                                                                   |



## Metabolic features of SAGs absent in other chlamydiae

### Supplementary Text 3

We identified a transporter for taurine in SAG AG-110-P3; this organic compound can serve as nutrient but is also known as cyroprotectant. Interestingly, a number of large proteins encoded on SAG AB-751-O23 and representing potential effector proteins (BQ\_00010, CA\_00010, CT\_00010, AI\_00010, AV\_00060, AZ\_00040, BM\_00010; also see [Supplementary Text 2](#)) have also been implicated in cryoprotection in marine microorganisms. Thus, the identification of different proteins potentially involved in cryoprotection in different chlamydial SAGs suggests that marine chlamydiae have adopted different mechanisms to cope with cold temperatures in their natural environment.

### Supplementary Text 4

Only two genes (*purKE*) are missing to complete the pathway for purine de novo synthesis in the SAG AG-110-M15 ([Supplementary Figure 4a](#)). Since all other genes of the purine biosynthesis pathway are encoded on a single genomic locus in the SAG, these genes might be present in the genome and only missing in the assembly, because the contig ends there ([Supplementary Figure 4b](#)). Most of the genes within the purine biosynthesis pathway show homology to genes from members of the *Marinimicrobia*. With the exception of two genes the remaining genes on this contig either are unique to AG-110-M15 (n=9) or are related to those of other chlamydiae (n=11). Whether this pathway is present in the SAG due to lateral gene transfer or was commonly present in ancient chlamydiae and lost in all other species analyzed to date is thus currently unclear.

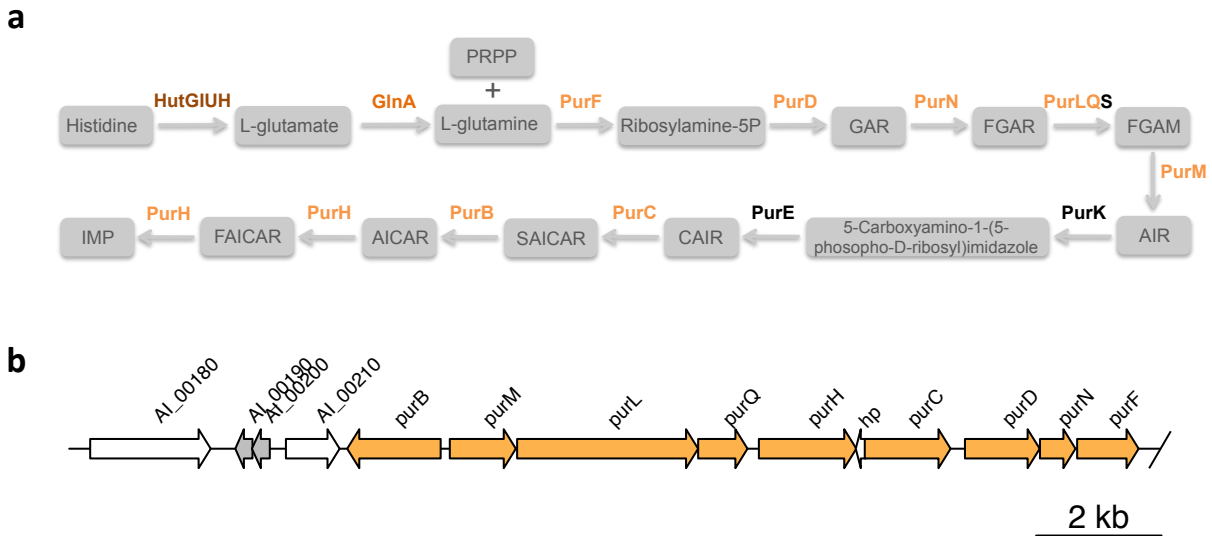

**Supplementary Figure 4. A nearly complete purine biosynthesis pathway is present in AG-110-M15.**

**(a)** Representation of the purine biosynthesis pathway (adapted from KEGG). Colored proteins are encoded, black proteins are missing in the assembly of AG-110-M15. The same color indicates presence at the same genomic locus. PRPP – phosphoribosylpyrophosphate, GAR – glycinamide ribonucleotide, FGAR – N-formylglycinamide ribonucleotide, FGAM – N-formylglycinamide ribonucleotide, AIR – Aminoimidazole ribonucleotide, CAIR – Carboxyaminoimidazole ribonucleotide, SAICAR – N-succinocarboxamide-5-aminoimidazole ribonucleotide, AICAR – aminoimidazole-4-carboxamide ribonucleotide, FAICAR – 5-formamido-4-imidazolecarboxamide ribonucleotide, IMP – Inosine monophosphate **(b)** Gene organization at the purine locus in the assembly of AG-110-M15. The contig ends after *purF*. Orange genes belong to the purine pathway, grey genes are present in other chlamydial genomes, white genes encode hypothetical proteins.

## Flagellar genes in chlamydiae

### Supplementary Text 5

Non-flagellar T3SSs are present in all chlamydiae. This secretion system originally evolved from the flagellar system, and both systems still share many homologous proteins ([Figure 3a](#)) (Abby and Rocha, 2012). In addition to the NF-T3SS, members of the *Chlamydiaceae* also encode few homologs of flagellar genes (*fliA*, *F*, *H*, *I*, *flhA*), whose functions are not well understood (Peters *et al.*, 2007; Ferrell and Fields, 2016). Because in members of the *Chlamydiaceae* the flagellar genes are transcribed early in the developmental cycle, and because interactions between flagellar proteins and NF-T3SS components could be detected (Stone *et al.*, 2010), the current hypothesis is, that *Chlamydiaceae* use their flagellar genes to assemble a second slightly different NF-T3SS apparatus, in which some NF-T3SS proteins are replaced by their respective flagellar homologs. This alternative T3SS might be fully assembled at the middle of the developmental cycle and might be employed for interaction with the host cell during this developmental stage (Peters *et al.*, 2007; Ferrell and Fields, 2016).

Another flagellar component found in all chlamydial genomes including the SAGs, but lacking in *C. trachomatis*, is the gene for the flagellar cytoplasmic transmembrane component FliO. FliO is the least conserved protein among the membrane-bound components of the flagellar export apparatus (Tsang and Hoover, 2014) and has no homolog in NF-T3SSs. Indeed it is not annotated in many genomes, because of its weak homology to recognized FliO proteins. FliO has been shown to regulate FliP, and to be necessary for full motility of the flagellum (Barker *et al.*, 2010). What FliO would contribute in chlamydial genomes without flagella is unclear, but it could be involved in regulation of the NF-T3SS.

## Flagellar genes in marine SAGs

### Supplementary Text 6

The flagellar gene set found in SAG AB-751-O23 is the most complete flagellar machinery ever detected in chlamydiae. Only genes for the formation of the inner rod (*flgB*, *C*, *F*, *G*), the P- and L-ring components (*flgH*, *I*), *fliE* and *flhE* are absent in AB-751-O23 (Figure 3a)(Chevance and Hughes, 2008). With the exception of *flhE* these genes can be found in the related SAG AG-110-M15. In this SAG the *flgBC* and *fliE* genes are located at one genomic region, whereas *flgFGAHIJN* form a cluster with *flgKL* and *fliWC*. The latter part of this gene cluster containing *flgKL* and *fliWC* is also present in SAG AB-751-O23, but the contig ends after *flgK* (Figure 3b). The synteny between the two SAGs at this locus indicates that the missing membrane anchoring parts of the flagellar basal body are indeed encoded in SAG AB-751-O23, but just missed due to contig break point at this location.

The flagellar genes are dispersed at various loci in each of the three SAGs. In AB-751-O23 six contigs harboring flagellar genes were detected. The arrangement of the genes at the different loci resembles that of *Thermotoga maritima* (Nelson *et al.*, 2001) and is not unusual in bacterial genomes. Flagellar genes detected in the assemblies of AG-110-M15 and AG-110-P3 can be found at four and two loci, respectively. The presence and patchy distribution of flagellar and chemotaxis components in chlamydial genomes is somewhat puzzling and might be best explained via differential gene loss.

## Phylogeny of flagellar proteins encoded in the SAGs

### Supplementary Text 7

Flagellar proteins encoded at different genomic loci in the SAGs were used for single protein phylogenies in order to further confirm that the respective genes indeed do not represent contaminations in the assemblies (i.e. are not closely related with known flagellar genes from other taxonomic groups), and to investigate whether the flagellar genes of the different SAGs are related with each other.

Single protein phylogenies were conducted for FlgL, FliS, FliQ/SctS, and FlhA/SctV with RAxML and Bayesian Inference. In addition, a concatenated dataset including FliPQR and FlhA was used (Figure 4, Supplementary Table 2). Where possible also homologous proteins present in NF-T3SSs were included in the datasets. As expected, none of the proteins analyzed showed a close relationship with known flagellar proteins from other taxonomic groups. With the exception of the phylogeny of FlhA, which is present only in AB-751-O23, and FlgL all trees demonstrated the monophyly for the SAG sequences (Figure 4, Supplementary Data). For FlgL, the flagellar hook-associated protein type 3, AB-751-O23 and AG-110-M15 were closest related without a sister lineage (Figure 4d), whereas the AG-110-P3 sequence grouped together with members of the *Verrucomicrobia*. FlgL is located extracellularly in the flagellum and therefore more prone to higher rates of evolution (Nogueira *et al.*, 2012), which might be the reason for the lack of monophyly for chlamydial proteins and the generally observed inconsistency of the branching pattern with 16S rRNA-based organismal phylogeny.

In the phylogenetic trees for FliQ/SctS (Figure 4c) and FlhA/SctV (Figure 4b) the SAGs formed individual deep branches, whereas in the cases of FliS (Figure 4e) and FliPQR-FlhA (Figure 4a) they formed sister clades to the *Verrucomicrobia* and the *Acidobacteria*, respectively. The monophyly of the SAGs was always highly supported independent of the treeing method applied, whereas the affiliation to the sister lineages showed only weak support due to the ancient origin of flagella and the lack of resolution close to the root of the tree (Figure 4, Supplementary Table 2, Supplementary Data).

**Supplementary Table 2. Summary of phylogenetic analyses of selected flagellar proteins encoded in the SAGs.**

| <b>Protein</b>                   | <b>Dataset</b>                                         | <b>Presence in SAGs</b> | <b>Method</b> | <b>Monophyly of SAGs*</b>                           | <b>Closest related phyla in dataset*</b>                                     |
|----------------------------------|--------------------------------------------------------|-------------------------|---------------|-----------------------------------------------------|------------------------------------------------------------------------------|
| <b>FliQ/SctS</b>                 | Flagellar and NF-T3SS proteins                         | All                     | MrBayes       | Yes (1)                                             | None                                                                         |
|                                  |                                                        |                         | RxML          | Yes (99)                                            | Unclear                                                                      |
| <b>FliH/SctV</b>                 | Flagellar and NF-T3SS proteins                         | AB-751-O23              | MrBayes       | Single branch                                       | Firmicutes and Spirochaetes (0.5)                                            |
|                                  |                                                        |                         | RxML          | Single branch                                       | Firmicutes (22)                                                              |
| <b>FliS</b>                      | Flagellar proteins                                     | AB-751-O23, AG-110-M15  | MrBayes       | Yes (1)                                             | Verrucomicrobia (0.72)                                                       |
|                                  |                                                        |                         | RxML          | Yes (85)                                            | Verrucomicrobia (15)                                                         |
| <b>FigL</b>                      | Flagellar proteins                                     | All                     | MrBayes       | AB-751-O23 and AG-110-M15: Yes (1); AG-110-P3: No   | AB-751-O23 and AG-110-M15: none; AG-110-P3: Verrucomicrobia (0.97)           |
|                                  |                                                        |                         | RxML          | AB-751-O23 and AG-110-M15: Yes (100); AG-110-P3: No | AB-751-O23 and AG-110-M15: Thermotogae (26); AG-110-P3: Verrucomicrobia (51) |
| <b>FliPQR, FliH/SctRST, SctV</b> | Concatenated flagellar and chlamydial NF-T3SS proteins | All                     | MrBayes       | Yes (1)                                             | Acidobacteria (0.99)                                                         |
|                                  |                                                        |                         | RxML          | Yes (100)                                           | Acidobacteria (29)                                                           |

\*Numbers in brackets indicate posterior probability values (MrBayes) or bootstrap support values [%](RxML).

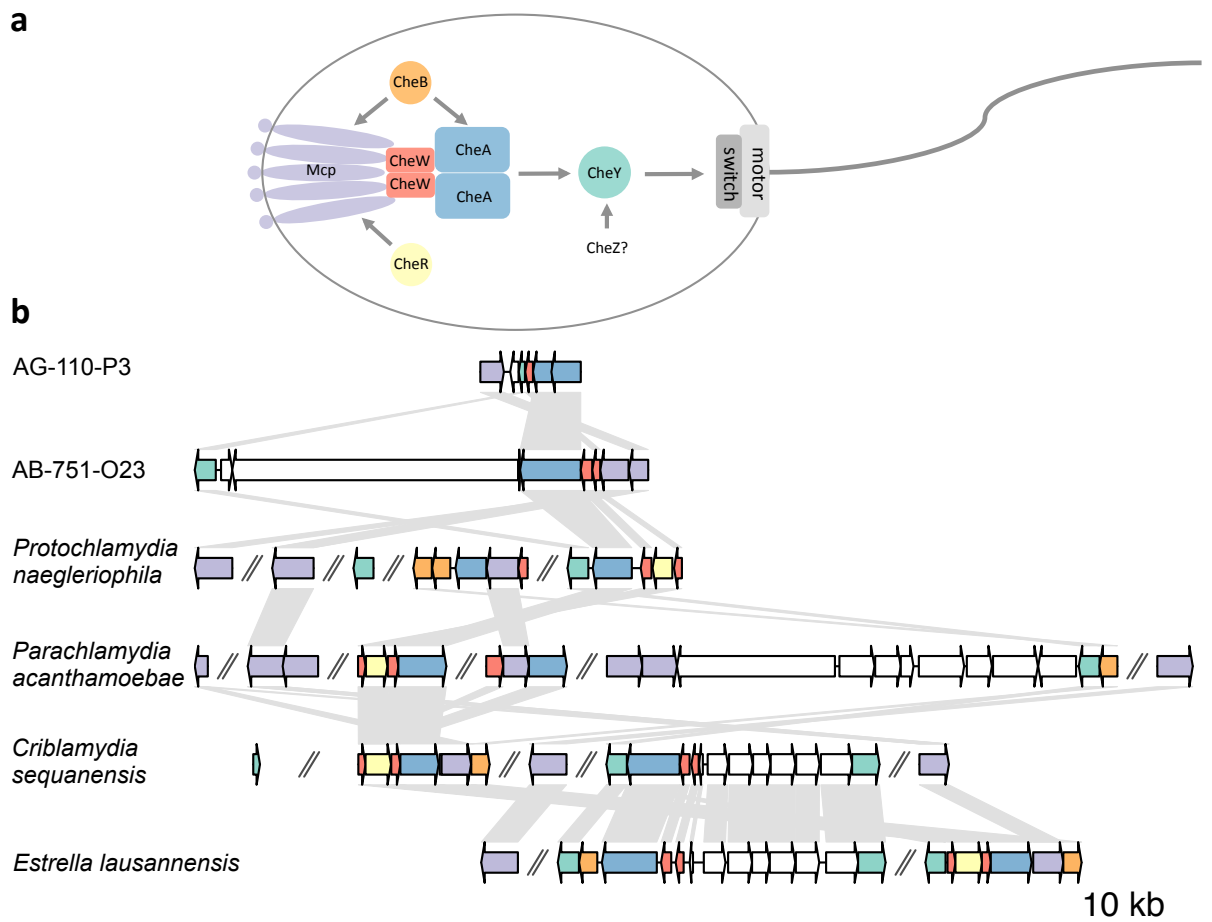

**Supplementary Figure 5. Presence and synteny of chemotaxis genes in chlamydial genomes.**

**a)** Schematic overview of the arrangement of proteins involved in chemotaxis. Mcp – Methyl-accepting chemotaxis protein, CheW – coupling protein, CheA – histidine kinase, CheY – response regulator, CheR – methyltransferase, CheB methylesterase, CheZ –phosphatase.

**b)** Synteny of chemotaxis genes in chlamydial genomes. Color coding as in a).

**Supplementary Table 3. Genome sequences used for the extraction of proteins used for phylogenetic analyses.**

| Replicon/Strain name                                                        | Abbreviation in tree files | NCBI Reference Sequence | System Type  | NF-T3SS family | Replicon Type | Class           | Order                 |
|-----------------------------------------------------------------------------|----------------------------|-------------------------|--------------|----------------|---------------|-----------------|-----------------------|
| <i>Acetohalobium arabaticum</i> DSM 5501                                    | acear                      | NC_014378.1             | Fig          |                | chromosome    | Firmicutes      | Clostridia            |
| <i>Acidimicrobium ferrooxidans</i> DSM 10331                                | AFER                       | NC_013124.1             | Fig          |                | chromosome    | Actinobacteria  | Acidimicrobiales      |
| <i>Acidobacterium capsulatum</i> ATCC 51196                                 | ACP                        | NC_012483.1             | Fig          |                | chromosome    | Acidobacteria   | Acidobacteriales      |
| <i>Actinosynnema mirum</i> DSM 43827                                        | AMIR                       | NC_013093.1             | Fig          |                | chromosome    | Actinobacteria  | Actinobacteriales     |
| <i>Aeromonas salmonicida</i> subsp. <i>salmonicida</i> A449 plasmid 5       | ASA                        | NC_009350.1             | NF-T3SS      | ysc            | plasmid       | Proteobacteria  | Gammaproteobacteria   |
| <i>Agrobacterium tumefaciens</i> strain Ach5                                | Ach5                       | NZ_CP011246.1           | Fig          |                | chromosome    | Proteobacteria  | Alphaproteobacteria   |
| <i>Alicyclobacillus acidocaldarius</i> subsp. <i>acidocaldarius</i> DSM 446 | AACI                       | NC_013205.1             | Fig          |                | chromosome    | Firmicutes      | Bacillales            |
| <i>Alkalihalimicola ehrlichii</i> MLHE-1                                    | MLG                        | NC_008340.1             | Fig          |                | chromosome    | Firmicutes      | Gammaproteobacteria   |
| <i>Alkaliphilium metalliredigens</i> QYMF                                   | AMET                       | NC_009633.1             | Fig          |                | chromosome    | Firmicutes      | Clostridia            |
| <i>Alteromonas macleodii</i> str. 'Deep ecotype'                            | MADE                       | NC_011138.3             | Fig          |                | chromosome    | Proteobacteria  | Gammaproteobacteria   |
| <i>Anaeromyxobacter dehalogenans</i> 2CP-C                                  | ADEH                       | NC_007760.1             | NF-T3SS, Fig | Myxo           | chromosome    | Proteobacteria  | Deitaproteobacteria   |
| <i>Anaeromyxobacter</i> sp. Fw109-5                                         | ANAE109                    | NC_009675.1             | NF-T3SS      | Myxo           | chromosome    | Proteobacteria  | Deitaproteobacteria   |
| <i>Anaeromyxobacter</i> sp. K                                               | ANAEK                      | NC_011145.1             | NF-T3SS      | Myxo           | chromosome    | Proteobacteria  | Deitaproteobacteria   |
| <i>Anoxybacillus flavithermus</i> WK1                                       | AFLV                       | NC_011567.1             | Fig          |                | chromosome    | Firmicutes      | Bacillales            |
| <i>Aquifex aeolicus</i> VF5                                                 | aq                         | NC_000918.1             | Fig          |                | chromosome    | Aquificae       | Aquificales           |
| <i>Arthrobacter chlorophenolicus</i> A6                                     | ACHL                       | NC_011886.1             | Fig          |                | chromosome    | Actinobacteria  | Actinobacteriales     |
| <i>Azorhizobium caulinodans</i> ORS 571 DNA                                 | AZC                        | NC_009937.1             | Fig          |                | chromosome    | Proteobacteria  | Alphaproteobacteria   |
| <i>Bacillus clausii</i> KSM-K16 DNA                                         | ABC                        | NC_006582.1             | Fig          |                | chromosome    | Firmicutes      | Bacillales            |
| <i>Bacillus halodurans</i> C-125 DNA                                        | BH                         | NC_002570.2             | Fig          |                | chromosome    | Firmicutes      | Bacillales            |
| <i>Bacillus pumilus</i> SAFR-032                                            | BPUM                       | NC_009848.1             | Fig          |                | chromosome    | Firmicutes      | Bacillales            |
| <i>Bacillus subtilis</i> subsp. <i>subtilis</i> str. 168                    | BSU                        | NC_000964.3             | Fig          |                | chromosome    | Firmicutes      | Bacillales            |
| <i>Blastopirellula marina</i> DSM 3645                                      | Blastopirellula            | NZ_AA200000000.1        | Fig          |                | chromosome    | Planctomycetes  | Planctomycetalia      |
| <i>Bordetella bronchiseptica</i> strain RB50                                | BB_2, BB_RS                | NC_002927.3             | NF-T3SS      | ysc            | chromosome    | Proteobacteria  | Betaproteobacteria    |
| <i>Bordetella parapertussis</i> Bpp5                                        | BN117                      | NC_018828.1             | NF-T3SS      | ysc            | chromosome    | Proteobacteria  | Betaproteobacteria    |
| <i>Bordetella pertussis</i> Tohama I                                        | BP                         | NC_002929.2             | NF-T3SS      | ysc            | chromosome    | Proteobacteria  | Betaproteobacteria    |
| <i>Borrelia burgdorferi</i> B31                                             | BB_1, BB_                  | NC_001318.1             | Fig          |                | chromosome    | Spirochaetes    | Spirochaetales        |
| <i>Borrelia hermsii</i> MTW                                                 | BHW                        | NZ_CP005680.1           | Fig          |                | chromosome    | Spirochaetes    | Spirochaetales        |
| <i>Brachyspira hyodysenteriae</i> WA1                                       | BHWA1                      | NC_012225.1             | Fig          |                | chromosome    | Spirochaetes    | Spirochaetales        |
| <i>Bradyrhizobium japonicum</i> USDA 6 DNA                                  | BJ6T                       | NC_017249.1             | NF-T3SS      | Rhizob         | chromosome    | Proteobacteria  | Alphaproteobacteria   |
| <i>Buchnera aphidicola</i> str. 5A ( <i>Acyrtosiphon pisum</i> )            | BUAP5A                     | NC_011833.1             | Fig          |                | plasmid       | Proteobacteria  | Gammaproteobacteria   |
| <i>Burkholderia ambifaria</i> MC40-6 chromosome 1                           | BAIMMC406                  | NC_010551.1             | Fig          |                | chromosome    | Proteobacteria  | Betaproteobacteria    |
| <i>Burkholderia ambifaria</i> MC40-6 chromosome 2                           | BAIMMC406                  | NC_010552.1             | NF-T3SS      | Hrp2           | chromosome    | Proteobacteria  | Betaproteobacteria    |
| <i>Burkholderia ambifaria</i> MC40-6 chromosome 3                           | BAIMMC406                  | NC_010557.1             | NF-T3SS      | Hrp2           | chromosome    | Proteobacteria  | Betaproteobacteria    |
| <i>Burkholderia mallei</i> ATCC 23344 chromosome 1                          | BMA                        | NC_006348.1             | Fig          |                | chromosome    | Proteobacteria  | Betaproteobacteria    |
| <i>Burkholderia mallei</i> ATCC 23344 chromosome 2                          | BMA                        | NC_006349.2             | NF-T3SS      | SPI-1, Hrp2    | chromosome    | Proteobacteria  | Betaproteobacteria    |
| <i>Caldicellulosiruptor bescii</i> DSM 6725                                 | ATHE                       | NC_012034.1             | Fig          |                | chromosome    | Firmicutes      | Clostridia            |
| <i>Calditerrivibrio nitroreducens</i> DSM 19672                             | CALNI                      | NC_009437.1             | Fig          |                | chromosome    | Firmicutes      | Clostridia            |
| <i>Campylobacter jejuni</i> RM1221                                          | CJE                        | NC_003912.7             | Fig          |                | chromosome    | Deferribacteres | Deferribacterales     |
| <i>Candidatus Hamiltonella defensa</i> 5AT ( <i>Acyrtosiphon pisum</i> )    | HDEF                       | NC_012751.1             | NF-T3SS      | SPI-1, SPI-2   | chromosome    | Proteobacteria  | Epsilonproteobacteria |
| <i>Candidatus Koribacter versatilis</i> Elin345                             | ACID345                    | NC_008009.1             | Fig          |                | chromosome    | Acidobacteria   | Candidatus Koribacter |
| <i>Candidatus Nitrospira defluvii</i> chromosome                            | NIDE                       | NC_014355.1             | Fig          |                | chromosome    | Nitrospirae     | Nitrospirales         |
| <i>Candidatus Protochlamydia amoebophila</i> UWEE25                         | PC                         | NC_005861.1             | NF-T3SS      | Chlamy         | chromosome    | Chlamydiae      | Chlamydiales          |
| <i>Candidatus Rubidus massiliensis</i>                                      | Rubis, BN1013              | CSC01000001.1           | NF-T3SS      | Chlamy         | chromosome    | Chlamydiae      | Chlamydiales          |
| <i>Caulobacter crescentus</i> CB15                                          | CC                         | NC_002696.2             | Fig          |                | chromosome    | Proteobacteria  | Alphaproteobacteria   |
| <i>Chlamydia abortus</i> S26/3                                              | CAB                        | NC_004552.2             | NF-T3SS      | Chlamy         | chromosome    | Chlamydiae      | Chlamydiales          |
| <i>Chlamydia avium</i> 10DC88                                               | RT28                       | NZ_CP006571.1           | NF-T3SS      | Chlamy         | chromosome    | Chlamydiae      | Chlamydiales          |
| <i>Chlamydia caviae</i> GPIC                                                | CCA                        | NC_003361.3             | NF-T3SS      | Chlamy         | chromosome    | Chlamydiae      | Chlamydiales          |



|                                                                   |               |                   |              |                   |            |                  |                     |
|-------------------------------------------------------------------|---------------|-------------------|--------------|-------------------|------------|------------------|---------------------|
| <i>Chlamydia felis</i> Fe/C-56                                    | CF            | NC_007899.1       | NF-T3SS      | Chlamy            | chromosome | Chlamydiae       | Chlamydiales        |
| <i>Chlamydia muridarum</i> Nigg                                   | TC            | NC_002620.2       | NF-T3SS      | Chlamy            | chromosome | Chlamydiae       | Chlamydiales        |
| <i>Chlamydia pecorum</i> E58                                      | G5S           | NC_015408.1       | NF-T3SS      | Chlamy            | chromosome | Chlamydiae       | Chlamydiales        |
| <i>Chlamydia pneumoniae</i> CWL029                                | CPn           | NC_000922.1       | NF-T3SS      | Chlamy            | chromosome | Chlamydiae       | Chlamydiales        |
| <i>Chlamydia pneumoniae</i> LPK0LN                                | GPK           | NC_017287.1       | NF-T3SS      | Chlamy            | chromosome | Chlamydiae       | Chlamydiales        |
| <i>Chlamydia psittaci</i> 6BC                                     | G5O           | NC_017287.1       | NF-T3SS      | Chlamy            | chromosome | Chlamydiae       | Chlamydiales        |
| <i>Chlamydia trachomatis</i> AHAR-13                              | CTA           | NC_007429.1       | NF-T3SS      | Chlamy            | chromosome | Chlamydiae       | Chlamydiales        |
| <i>Chlamydia trachomatis</i> D/UW-3/CX                            | CT            | NC_000117.1       | NF-T3SS      | Chlamy            | chromosome | Chlamydiae       | Chlamydiales        |
| <i>Chlamydia bacterium</i> SM23_39                                | SM23_39       | LJUH00000000.1    | NF-T3SS      | Chlamy            | chromosome | Chlamydiae       | Chlamydiales        |
| <i>Chlamydiales bacterium</i> SCGC-AB-751-O23                     | AB_751_O23    | FLYP01000000.1    | Fig, NF-T3SS | Chlamy            | chromosome | Chlamydiae       | Chlamydiales        |
| <i>Chlamydiales bacterium</i> SCGC-AG-110-P3                      | AG_110_P3     | FLYP01000000.1    | NF-T3SS, Fig | Chlamy            | chromosome | Chlamydiae       | Chlamydiales        |
| <i>Chlamydiales bacterium</i> SCGC-AG-110-M15                     | AG_110_M15    | FLY001000000.1    | NF-T3SS, Fig | Chlamy            | chromosome | Chlamydiae       | Chlamydiales        |
| <i>Chromobacterium violaceum</i> ATCC 12472                       | CV            | NC_005085.1       | Fig, NF-T3SS | SPI-1, SPI-2      | chromosome | Proteobacteria   | Betaproteobacteria  |
| <i>Citrobacter rodentium</i> ICC168                               | ROD           | NC_013716.1       | NF-T3SS      | SPI-2             | chromosome | Proteobacteria   | Gammaproteobacteria |
| <i>Clostridium botulinum</i> A str. Hall                          | CLC           | NC_009698.1       | Fig          |                   | chromosome | Firmicutes       | Clostridia          |
| <i>Clostridium cellulolyticum</i> H10                             | CCEL          | NC_011898.1       | Fig          |                   | chromosome | Firmicutes       | Clostridia          |
| <i>Colwellia psychrerythraea</i> 34H                              | CPS           | NC_003910.7       | Fig          |                   | chromosome | Chlamydiae       | Chlamydiales        |
| <i>Criblamydia sequanensis</i>                                    | CSEC          | NZ_CCEJ00000000.1 | NF-T3SS      | Chlamy            | chromosome | Proteobacteria   | Gammaproteobacteria |
| <i>Cupriavidus taiwanensis</i> str. LM/G19424                     | RALTA         | NC_010530.1       | NF-T3SS      | Hrp2              | chromosome | Proteobacteria   | Betaproteobacteria  |
| <i>Denitrovibrio acetiphilus</i> DSM 12809                        | DACET         | NC_013943.1       | Fig          |                   | chromosome | Deferribacteres  | Deferribacterales   |
| <i>Desulfotribrio vulgaris</i> str. Hildenborough chromosome      | DVUJ          | NC_002937.3       | Fig          |                   | chromosome | Proteobacteria   | Deltaproteobacteria |
| <i>Desulfotribrio vulgaris</i> str. Hildenborough plasmid pDV     | DVUA          | NC_005863.1       | NF-T3SS      | ysc               | plasmid    | Proteobacteria   | Deltaproteobacteria |
| <i>Dickeya zeae</i> Ech1591                                       | DD1591        | NC_012912.1       | Fig, NF-T3SS | Hrp1              | chromosome | Proteobacteria   | Gammaproteobacteria |
| <i>Diplospira colitermitum</i> TAV2                               | Diplospiraera | NZ_ABEA00000000.3 | Fig          |                   | chromosome | Verrucomicrobia  | Opitutae            |
| <i>Erwinia amylovora</i> ATCC 49946                               | EAM           | NC_013971.1       | NF-T3SS, Fig | SPI-1, SPI-1, Hrp | chromosome | Proteobacteria   | Gammaproteobacteria |
| <i>Erwinia pyrifoliae</i> strain Ep1/96                           | EPC           | NC_012214.1       | NF-T3SS, Fig | SPI-1, Hrp1       | chromosome | Proteobacteria   | Gammaproteobacteria |
| <i>Escherichia coli</i> O157:H7 str. Sakai chromosome             | ECs           | NC_002695.1       | NF-T3SS, Fig | SPI-1, SPI-2      | chromosome | Proteobacteria   | Gammaproteobacteria |
| <i>Estrella lausannerensis</i> CRIB-30                            | ElaU          | CWGJ01000000      | NF-T3SS      | Chlamy            | chromosome | Chlamydiae       | Chlamydiales        |
| <i>Exiguobacterium sibiricum</i> 255-15                           | EXIG          | NC_010556.1       | Fig          |                   | chromosome | Firmicutes       | Bacillales          |
| <i>Gemmata obscuriglobus</i> UQM2246                              | Gemmata       | NZ_ABG000000000.1 | Fig          |                   | chromosome | Planctomycetes   | Planctomycetacia    |
| <i>Gemmatimonas aurantiaca</i> T-27 DNA                           | GAU           | NC_012489.1       | Fig          |                   | chromosome | Gemmatimonadetes | Gemmatimonadales    |
| <i>Geobacillus kaustophilus</i> HTA426 DNA                        | GK            | NC_006510.1       | Fig          |                   | chromosome | Firmicutes       | Bacillales          |
| <i>Gimesia maris</i> DSM8797                                      | Gimesia       | NZ_ABCE00000000.1 | Fig          |                   | chromosome | Planctomycetes   | Planctomycetacia    |
| <i>Hahella chejuensis</i> KCTC 2396                               | HCH           | NC_007645.1       | NF-T3SS, Fig | ysc, ysc          | chromosome | Proteobacteria   | Gammaproteobacteria |
| <i>Herbaspirillum seropedicae</i> SmR1                            | HSERO         | NC_014323.1       | NF-T3SS      | Hrp1              | chromosome | Proteobacteria   | Betaproteobacteria  |
| <i>Hydrogenobaculum</i> sp. Y04AAS1                               | HY04AAS1      | NC_011126.1       | Fig          |                   | chromosome | Aquificae        | Aquificales         |
| <i>Isosphaera pallida</i> ATCC43644                               | Isosphaera    | NC_014962.1       | Fig          |                   | chromosome | Planctomycetes   | Planctomycetacia    |
| <i>Legionella pneumophila</i> str. Paris                          | LPP           | NC_006368.1       | Fig          |                   | chromosome | Proteobacteria   | Gammaproteobacteria |
| <i>Leptospira interrogans</i> serovar Lai str. 56601 chromosome I | LA            | NC_004342.2       | Fig          |                   | chromosome | Spirochaetes     | Spirochaetales      |
| <i>Marinomonas mediterranea</i> MMB-1                             | MARME         | NC_015276.1       | NF-T3SS      | Hrp1              | chromosome | Proteobacteria   | Gammaproteobacteria |
| <i>Mesorhizobium loti</i> MAFF303099 DNA                          | MAFF          | NC_002678.2       | Fig, NF-T3SS | Rhizob            | chromosome | Proteobacteria   | Alphaproteobacteria |
| <i>Myxococcus fulvus</i> HW-1                                     | LILAB         | NC_015711.1       | NF-T3SS      | Myxo, Myxo        | chromosome | Proteobacteria   | Deltaproteobacteria |
| <i>Myxococcus xanthus</i> DK 1622                                 | MXAN          | NC_008095.1       | NF-T3SS      | Myxo, Myxo        | chromosome | Proteobacteria   | Deltaproteobacteria |
| <i>Neochlamydia</i> sp. EPS4                                      | EPS4_DB42     | NZ_JSD000000000.1 | NF-T3SS      | Chlamy            | chromosome | Chlamydiae       | Chlamydiales        |
| <i>Neochlamydia</i> sp. S13                                       | NeoS13        | NZ_BASK00000000.1 | NF-T3SS      | Chlamy            | chromosome | Chlamydiae       | Chlamydiales        |
| <i>Neochlamydia</i> sp. TUME1                                     | TUME1         | NZ_JRXI00000000.1 | NF-T3SS      | Chlamy            | chromosome | Chlamydiae       | Chlamydiales        |
| <i>Opitutaceae bacterium</i> TAV1                                 | Opitutaceae   | NZ_AHKS00000000.1 | Fig          |                   | chromosome | Verrucomicrobia  | Opitutae            |
| <i>Opitutus terrae</i> PB90-1                                     | Opitutus_OTER | NC_010571.1       | Fig          |                   | chromosome | Verrucomicrobia  | Opitutae            |
| <i>Parachlamydia acanthamoebae</i> UV-7                           | PUV           | NC_015702.1       | NF-T3SS      | Chlamy            | chromosome | Chlamydiae       | Chlamydiales        |
| <i>Parachlamydiaeae bacterium</i> HS-T3                           | HS_T3         | NZ_BBPT00000000.1 | NF-T3SS      | Chlamy            | chromosome | Chlamydiae       | Chlamydiales        |
| <i>Petrogoga mobilis</i> SJ95                                     | PMOB          | NC_010003.1       | Fig          |                   | chromosome | Thermotogae      | Thermotogales       |
| <i>Photobacterium luminescens</i> subsp. laumondii T101           | PLU           | NC_005126.1       | Fig, NF-T3SS | ysc               | chromosome | Proteobacteria   | Gammaproteobacteria |

|                                                                     |                       |                   |              |              |                 |                       |
|---------------------------------------------------------------------|-----------------------|-------------------|--------------|--------------|-----------------|-----------------------|
| Physisphaera mikurensis NBRC 102666                                 | Physisphaera          | NC_017080.1       | Fig          | chromosome   | Planctomycetes  | Physisphaera          |
| Pirellula staleyii DSM 6068                                         | PSTA, Pirellula       | NC_013720.1       | Fig          | chromosome   | Planctomycetes  | Planctomycetacia      |
| Planctopirus limnophila                                             | Planctopirus          | NC_014148.1       | Fig          | chromosome   | Planctomycetes  | Planctomycetacia      |
| Proteus mirabilis strain H14320                                     | PMI                   | NC_010554.1       | NF-T3SS, Flg | SPI-1        | Proteobacteria  | Gammaproteobacteria   |
| Protochlamydia naegleriphila                                        | ProNaeg               | NZ_LN879502.1     | NF-T3SS      | Chlamy       | Chlamydiae      | Chlamydiales          |
| Pseudomonas aeruginosa PAO1                                         | PA                    | NC_002516.2       | NF-T3SS      | ysc          | Proteobacteria  | Gammaproteobacteria   |
| Pseudomonas syringae pv. syringae HS191                             | PSYRH                 | NZ_CP006256.1     | Fig, NF-T3SS | Hrp1         | Proteobacteria  | Gammaproteobacteria   |
| Ralstonia solanacearum CMR15 chromosome                             | CMR15                 | NC_017559.1       | Fig          |              | Proteobacteria  | Betaproteobacteria    |
| Ralstonia solanacearum CMR15 plasmid CMR15mp                        | CMR15                 | NC_017599.1       | NF-T3SS      | Hrp2         | Proteobacteria  | Betaproteobacteria    |
| Rhabdochlamydia porcellionis 15C                                    | Rhab                  | single proteins   | NF-T3SS      | Chlamy       | Chlamydiae      | Chlamydiales          |
| Rhodopirellula baltica SH1                                          | Rhodopirellula        | NC_005027.1       | Fig          | chromosome   | Planctomycetes  | Planctomycetacia      |
| Rubinisphaera brasiliensis DSM5305                                  | Rubinisphaera         | NC_015174.1       | Fig          | chromosome   | Planctomycetes  | Planctomycetacia      |
| Salmonella enterica subsp. enterica serovar Typhi str. CT18         | STM                   | NC_003198.1       | Fig, NF-T3SS | SPI-1, SPI-2 | Proteobacteria  | Gammaproteobacteria   |
| Salmonella enterica subsp. enterica serovar Typhimurium str. LT2    | STM                   | NC_003197.1       | Fig, NF-T3SS | SPI-1, SPI-2 | Proteobacteria  | Gammaproteobacteria   |
| Schlesneria pallidicola DSM18645                                    | Schlesneria           | NZ_AHZR0000000.1  | Fig          | chromosome   | Planctomycetes  | Planctomycetacia      |
| Shewanella violacea DSS12 DNA                                       | SVI                   | NC_014012.1       | NF-T3SS      | SPI-2        | Proteobacteria  | Gammaproteobacteria   |
| Sinkantia negevensis Z                                              | SNE                   | NC_015713.1       | NF-T3SS      | Chlamy       | Chlamydiae      | Chlamydiales          |
| Sinorhizobium fredii NGR234 chromosome                              | NGR                   | NC_012587.1       | Fig          | chromosome   | Proteobacteria  | Alphaproteobacteria   |
| Sinorhizobium fredii NGR234 plasmid pNGR234a                        | NGR                   | NC_000914.2       | NF-T3SS      | Rhizob       | Proteobacteria  | Alphaproteobacteria   |
| Sinorhizobium fredii NGR234 plasmid pNGR234b                        | NGR                   | NC_012586.1       | NF-T3SS      | Rhizob       | Proteobacteria  | Alphaproteobacteria   |
| Sodalis glossiniidius str. 'morsitans' DNA                          | SGP1                  | NC_007712.1       | Fig, NF-T3SS | SPI-1, SPI-2 | Proteobacteria  | Gammaproteobacteria   |
| Spirochaeta thermophila DSM 6578                                    | SPITH                 | NC_017583.1       | Fig          | chromosome   | Spirochaetes    | Spirochaetales        |
| Stigmatella aurantiaca DW4/3-1                                      | STIAUR                | NC_014623.1       | NF-T3SS      | Myxo, Myxo   | Proteobacteria  | Delephaproteobacteria |
| Sulfurihydrogenibium azorense Az-Fu1                                | SULAZ                 | NC_012438.1       | Fig          | chromosome   | Aquificae       | Aquificales           |
| Thermoanaerobacter tengcongensis MB4                                | TTE                   | NC_003869.1       | Fig          | chromosome   | Firmicutes      | Clostridia            |
| Thermosiphio melanesiensis B1429                                    | TMEL                  | NC_009616.1       | Fig          | chromosome   | Thermotogae     | Thermotogales         |
| Thermotoga maritima MSB8                                            | TM                    | NC_000853.1       | Fig          | chromosome   | Thermotogae     | Thermotogales         |
| Thioalkalivibrio sulfidophilus HL-EbGr7                             | TGR7                  | NC_011901.1       | Fig          | chromosome   | Proteobacteria  | Gammaproteobacteria   |
| Treponema denticola ATCC 35405                                      | TDE                   | NC_002967.9       | Fig          | chromosome   | Spirochaetes    | Spirochaetales        |
| Variovorax paradoxus EPS                                            | VARPA                 | NC_014931.1       | NF-T3SS      | Hrp2         | Proteobacteria  | Betaproteobacteria    |
| Verrucomicrobium spinosum DSM 4136                                  | Verrucomicrobium, VSP | NZ_ABIZ01000001.1 | NF-T3SS      |              | Verrucomicrobia | Verrucomicrobiae      |
| Vibrio parahaemolyticus RIMD 2210633 chromosome 1                   | VP                    | NC_004603.1       | Fig, NF-T3SS | ysc          | Proteobacteria  | Gammaproteobacteria   |
| Vibrio parahaemolyticus RIMD 2210633 chromosome 2                   | VPA                   | NC_004605.1       | Fig          | chromosome   | Proteobacteria  | Gammaproteobacteria   |
| Waddlia chondrophila WSU 86-1044                                    | WCW                   | NC_014225.1       | NF-T3SS      | Chlamy       | Chlamydiae      | Chlamydiales          |
| Xanthomonas campestris pv. campestris str. ATCC 33913               | XCC                   | NC_003902.1       | Fig, NF-T3SS | Hrp2         | Proteobacteria  | Gammaproteobacteria   |
| Yersinia enterocolitica subsp. enterocolitica 8081 chromosome       | YE                    | NC_008800.1       | Fig, NF-T3SS | SPI-1        | Proteobacteria  | Gammaproteobacteria   |
| Yersinia enterocolitica subsp. enterocolitica 8081 plasmid pYVe8081 | YEP                   | NC_008791.1       | NF-T3SS      | ysc          | Proteobacteria  | Gammaproteobacteria   |
| Yersinia pestis CO92 chromosome                                     | YPO                   | NC_003143.1       | Fig, NF-T3SS | SPI-2        | Proteobacteria  | Gammaproteobacteria   |
| Yersinia pestis CO92 plasmid pCD1                                   | YPCD1                 | NC_003131.1       | NF-T3SS      | ysc          | Proteobacteria  | Gammaproteobacteria   |

Sequences of marked species were extracted from protein fasta files downloaded from NCBI instead of genbank files.

**Supplementary Table 4. Metagenomes harboring FlaH sequences closely related to AB-751-023**

| Gene ID    | Locus Tag                      | Gene Product Name                              | Genome                                                                                                                                                                                                                        |
|------------|--------------------------------|------------------------------------------------|-------------------------------------------------------------------------------------------------------------------------------------------------------------------------------------------------------------------------------|
| 3300002835 | B570L40625_10000123015         | Flagellar biosynthesis pathway, component FlaH | Freshwater microbial communities from Lake Mendota, WI - 13AUG2008 deep hole epilimnion (Lake Mendota Combined Ray assembly, ASSEMBLY_DATE=20140605) (MER-FS) (assembled)                                                     |
| 3300002152 | C687J26680_10047071            | Flagellar biosynthesis pathway, component FlaH | Groundwater microbial communities from Rifle, Colorado - Rifle Oxygen_injection A3 (Rifle Oxygen_injection A3, ASSEMBLY_DATE=20131127) (MER-FS) (assembled)                                                                   |
| 3300002503 | C687J35164_100025631           | Flagellar biosynthesis pathway, component FlaH | Soil microbial communities from Rifle, Colorado - Rifle CSP2_sed 13_3 (Uranium-contaminated soil microbial communities from Rifle, Colorado - Rifle CSP2_sed 13_3, ASSEMBLY_DATE=20140303) (MER-FS) (assembled)               |
| 3300004274 | Ga0066607_10054914             | Flagellar biosynthesis pathway, component FlaH | Marine microbial communities from expanding oxygen minimum zones in the Saanich Inlet - S1075_LV_DNA_120m (*) (MER-FS) (assembled)                                                                                            |
| 3300004277 | Ga0066611_100192532            | Flagellar biosynthesis pathway, component FlaH | Marine microbial communities from expanding oxygen minimum zones in the Saanich Inlet - S1075_LV_DNA_200m (*) (MER-FS) (assembled)                                                                                            |
| 3300005351 | Ga0074239_11440264             | Flagellar biosynthesis pathway, component FlaH | Bioreactor AnanimoX bacterial community from Nijmegen, The Netherlands - Scalindua species enrichment (re-annotation) (*) (MER-FS) (assembled)                                                                                |
| 3300001380 | JG11356J14229_100044510        | Flagellar biosynthesis pathway, component FlaH | Subsurface groundwater microbial communities from S. Glens Falls, New York, USA - GWMW37 contaminated, 5.8 m (Subsurface groundwater monitoring well GWMW37 contaminated, 5.8 m, ASSEMBLY_DATE=20130411) (MER-FS) (assembled) |
| 3300001380 | JG11356J14229_100197444        | Flagellar biosynthesis pathway, component FlaH | Subsurface groundwater microbial communities from S. Glens Falls, New York, USA - GWMW37 contaminated, 5.8 m (Subsurface groundwater monitoring well GWMW37 contaminated, 5.8 m, ASSEMBLY_DATE=20130411) (MER-FS) (assembled) |
| 3300001380 | JG11356J14229_100496682        | Flagellar biosynthesis pathway, component FlaH | Subsurface groundwater microbial communities from S. Glens Falls, New York, USA - GWMW37 contaminated, 5.8 m (Subsurface groundwater monitoring well GWMW37 contaminated, 5.8 m, ASSEMBLY_DATE=20130411) (MER-FS) (assembled) |
| 3300003494 | JG126240J51127_10029472        | Flagellar biosynthesis pathway, component FlaH | Marine microbial communities from expanding oxygen minimum zones in the Saanich Inlet - S1037_S3LV_150m_DNA (Marine ASSEMBLY_DATE=20140926) (MER-FS) (assembled)                                                              |
| 3300003492 | JG126245J51145_10065432        | Flagellar biosynthesis pathway, component FlaH | Marine microbial communities from expanding oxygen minimum zones in the Saanich Inlet - S1037_S4LV_200m_DNA (Marine ASSEMBLY_DATE=20140930) (MER-FS) (assembled)                                                              |
| 3300003582 | JG126252J51714_10008226        | Flagellar biosynthesis pathway, component FlaH | Marine microbial communities from expanding oxygen minimum zones in the Saanich Inlet - S1073_LV_10m_DNA (Marine ASSEMBLY_DATE=20141005) (MER-FS) (assembled)                                                                 |
| 3300003599 | JG126270J51728_10101871        | Flagellar biosynthesis pathway, component FlaH | Marine microbial communities from expanding oxygen minimum zones in the Saanich Inlet - S1037_S3LV_10m_DNA (Marine ASSEMBLY_DATE=20141005) (MER-FS) (assembled)                                                               |
| 3300003600 | JG126272J51733_10026096        | Flagellar biosynthesis pathway, component FlaH | Marine microbial communities from expanding oxygen minimum zones in the Saanich Inlet - S1037_S3LV_10m_DNA (Marine ASSEMBLY_DATE=20141004) (MER-FS) (assembled)                                                               |
| 3300000255 | LP_F_10_S103_135DRAFT_10022538 | Flagellar biosynthesis pathway, component FlaH | Marine microbial communities from expanding oxygen minimum zones in Line P, North Pacific Ocean - sample_F_10_S103_135 (Line P sample_F_10_S103_135, March 2012 Assen) (*) (MER-FS) (assembled)                               |
| 3300000237 | S184jun09_150mDRAFT_10045362   | Flagellar biosynthesis pathway, component FlaH | Marine microbial communities from expanding oxygen minimum zones in the Saanich Inlet - 34_06/16/09 150m (Saanich Inlet 34_06/16/09 150m, March 2012 Assen) (*) (MER-FS) (assembled)                                          |
| 3300000172 | S184jun09_200mDRAFT_10088612   | Flagellar biosynthesis pathway, component FlaH | Marine microbial communities from expanding oxygen minimum zones in the Saanich Inlet - 34_06/16/09 200m (Saanich Inlet 34_06/16/09 200m, May 2012 Assen) (*) (MER-FS) (assembled)                                            |
| 3300000172 | S184jun09_200mDRAFT_10116882   | Flagellar biosynthesis pathway, component FlaH | Marine microbial communities from expanding oxygen minimum zones in the Saanich Inlet - 34_06/16/09 200m (Saanich Inlet 34_06/16/09 200m, May 2012 Assen) (*) (MER-FS) (assembled)                                            |
| 3300000170 | S186aug09_135mDRAFT_10079322   | Flagellar biosynthesis pathway, component FlaH | Marine microbial communities from expanding oxygen minimum zones in the Saanich Inlet - 36_08/11/09 135m (Saanich Inlet 36_08/11/09 135m, March 2012 Assen) (*) (MER-FS) (assembled)                                          |
| 3300000167 | S190nov09_120mDRAFT_10136222   | Flagellar biosynthesis pathway, component FlaH | Marine microbial communities from expanding oxygen minimum zones in the Saanich Inlet - 39_11/10/09 120m (Saanich Inlet 39_11/10/09 120m, March 2012 Assen) (*) (MER-FS) (assembled)                                          |
| 3300000212 | S47jul10_120mDRAFT_10025297    | Flagellar biosynthesis pathway, component FlaH | Marine microbial communities from expanding oxygen minimum zones in the Saanich Inlet - 47_07/07/10 120m (Saanich Inlet 47_07/07/10 120m, March 2012 Assen) (*) (MER-FS) (assembled)                                          |
| 3300000183 | S47jul10_135mDRAFT_10037382    | Flagellar biosynthesis pathway, component FlaH | Marine microbial communities from expanding oxygen minimum zones in the Saanich Inlet - 47_07/07/10 135m (Saanich Inlet 47_07/07/10 135m, March 2012 Assen) (*) (MER-FS) (assembled)                                          |
| 3300000154 | S47jul10_150mDRAFT_10029228    | Flagellar biosynthesis pathway, component FlaH | Marine microbial communities from expanding oxygen minimum zones in the Saanich Inlet - 47_07/07/10 150m (Saanich Inlet 47_07/07/10 150m, March 2012 Assen) (*) (MER-FS) (assembled)                                          |
| 3300000171 | S47jul10_200mDRAFT_10063161    | Flagellar biosynthesis pathway, component FlaH | Marine microbial communities from expanding oxygen minimum zones in the Saanich Inlet - 47_07/07/10 200m (Saanich Inlet 47_07/07/10 200m, March 2012 Assen) (*) (MER-FS) (assembled)                                          |
| 3300000150 | S48aug10_120mDRAFT_10021921    | Flagellar biosynthesis pathway, component FlaH | Marine microbial communities from expanding oxygen minimum zones in the Saanich Inlet - 48_08/11/10 120m (Saanich Inlet 48_08/11/10 120m, March 2012 Assen) (*) (MER-FS) (assembled)                                          |
| 3300000215 | S163jan11_120mDRAFT_10015725   | Flagellar biosynthesis pathway, component FlaH | Marine microbial communities from expanding oxygen minimum zones in the Saanich Inlet - 53_01/11/11 120m (Saanich Inlet 53_01/11/11 120m, March 2012 Assen) (*) (MER-FS) (assembled)                                          |
| 3300000211 | S163jan11_135mDRAFT_10008994   | Flagellar biosynthesis pathway, component FlaH | Marine microbial communities from expanding oxygen minimum zones in the Saanich Inlet - 53_01/11/11 135m (Saanich Inlet 53_01/11/11 135m, March 2012 Assen) (*) (MER-FS) (assembled)                                          |
| 3300000216 | S163jan11_150mDRAFT_10069052   | Flagellar biosynthesis pathway, component FlaH | Marine microbial communities from expanding oxygen minimum zones in the Saanich Inlet - 53_01/11/11 150m (Saanich Inlet 53_01/11/11 150m, March 2012 Assen) (*) (MER-FS) (assembled)                                          |
| 3300000201 | S164feb11_135mDRAFT_10004811   | Flagellar biosynthesis pathway, component FlaH | Marine microbial communities from expanding oxygen minimum zones in the Saanich Inlet - 54_02/08/11 135m (Saanich Inlet 54_02/08/11 135m, March 2012 Assen) (*) (MER-FS) (assembled)                                          |
| 3300000214 | S164feb11_200mDRAFT_10013884   | Flagellar biosynthesis pathway, component FlaH | Marine microbial communities from expanding oxygen minimum zones in the Saanich Inlet - 54_02/08/11 200m (Saanich Inlet 54_02/08/11 200m, March 2012 Assen) (*) (MER-FS) (assembled)                                          |

## Supplementary References

- Abby SS, Rocha EPC. (2012). The non-flagellar type III secretion system evolved from the bacterial flagellum and diversified into host-cell adapted systems. *PLoS Genet* **8**: e1002983.
- Barker CS, Meshcheryakova IV, Kostyukova AS, Samatey FA. (2010). FliO regulation of FliP in the formation of the Salmonella enterica flagellum. *PLoS Genet* **6**: e1001143.
- Charbonneau M-E, Berthiaume F, Mourez M. (2006). Proteolytic processing is not essential for multiple functions of the Escherichia coli autotransporter adhesin involved in diffuse adherence (AIDA-I). *J Bacteriol* **188**: 8504–8512.
- Chevance FFV, Hughes KT. (2008). Coordinating assembly of a bacterial macromolecular machine. *Nat Rev Microbiol* **6**: 455–465.
- Domman D, Collingro A, Lagkouravdos I, Gehre L, Weinmaier T, Rattei T, *et al.* (2014). Massive expansion of Ubiquitination-related gene families within the Chlamydiae. *Mol Biol Evol* **31**: 2890–2904.
- Elwell C, Mirrashidi K, Engel J. (2016). Chlamydia cell biology and pathogenesis. *Nat Rev Microbiol* **14**: 385–400.
- Ferrell JC, Fields KA. (2016). A working model for the type III secretion mechanism in Chlamydia. *Microbes Infect Inst Pasteur* **18**: 84–92.
- Gloeckl S, Ong VA, Patel P, Tyndall JDA, Timms P, Beagley KW, *et al.* (2013). Identification of a serine protease inhibitor which causes inclusion vacuole reduction and is lethal to Chlamydia trachomatis. *Mol Microbiol* **89**: 676–689.
- Klemm P, Vejborg RM, Sherlock O. (2006). Self-associating autotransporters, SAATs: functional and structural similarities. *Int J Med Microbiol IJMM* **296**: 187–195.
- Lagkouravdos I, Weinmaier T, Lauro FM, Cavicchioli R, Rattei T, Horn M. (2014). Integrating metagenomic and amplicon databases to resolve the phylogenetic and ecological diversity of the Chlamydiae. *ISME J* **8**: 115–125.
- Nelson KE, Eisen JA, Fraser CM. (2001). Genome of Thermotoga maritima MSB8. *Methods Enzymol* **330**: 169–180.
- Nogueira T, Touchon M, Rocha EPC. (2012). Rapid evolution of the sequences and gene repertoires of secreted proteins in bacteria. *PLoS One* **7**: e49403.
- Patel P, De Boer L, Timms P, Huston WM. (2014). Evidence of a conserved role for Chlamydia HtrA in the replication phase of the chlamydial developmental cycle. *Microbes Infect Inst Pasteur* **16**: 690–694.
- Peters J, Wilson DP, Myers G, Timms P, Bavoil PM. (2007). Type III secretion à la Chlamydia. *Trends Microbiol* **15**: 241–251.

- Pizzetti I, Fazi S, Fuchs BM, Amann R. (2012). High abundance of novel environmental chlamydiae in a Tyrrhenian coastal lake (Lago di Paola, Italy). *Environ Microbiol Rep* **4**: 446–452.
- Santelli CM, Orcutt BN, Banning E, Bach W, Moyer CL, Sogin ML, *et al.* (2008). Abundance and diversity of microbial life in ocean crust. *Nature* **453**: 653–656.
- Stone CB, Bulir DC, Gilchrist JD, Toor RK, Mahony JB. (2010). Interactions between flagellar and type III secretion proteins in *Chlamydia pneumoniae*. *BMC Microbiol* **10**: 18.
- Tsang J, Hoover TR. (2014). Requirement of the flagellar protein export apparatus component FliO for optimal expression of flagellar genes in *Helicobacter pylori*. *J Bacteriol* **196**: 2709–2717.
